# Supplementary material for: Polydopamine nanotubes-templated synthesis of TiO2and its photocatalytic performance under visible light
Source: Royal Society of Chemistry journal article supplement (doi:10.1039/c7ra03063k), 2017-01-01
Supplement: c7ra03063k1.pdf [file c7ra03063k1.pdf]

## **Supplementary Information**

### **Polydopamine Nanotubes-Templated Synthesis of TiO<sub>2</sub> and Its Photocatalytical Performance under Visible Light**

Zehuan Wang, Jia Li, Feng Tang, Jun Lin and Zhaoxia Jin\*

Department of Chemistry, Renmin University of China, Beijing, People's  
Republic of China

# Contents

|                                                                                                                                                                                           |   |
|-------------------------------------------------------------------------------------------------------------------------------------------------------------------------------------------|---|
| <b>1. Figures</b> .....                                                                                                                                                                   | 3 |
| <b>Fig. S1</b> HRTEM image of TiO <sub>2</sub> @C-PDA (400-1). .....                                                                                                                      | 3 |
| <b>Fig. S2</b> X-ray diffraction patterns of TiO <sub>2</sub> @PDA carbonized in argon for 3 hours at different temperatures. ....                                                        | 3 |
| <b>Fig. S3</b> XPS survey spectra of TiO <sub>2</sub> @C-PDA samples. ....                                                                                                                | 4 |
| <b>Fig. S4</b> Thermogravimetric (TGA) curves of TiO <sub>2</sub> @C-PDA (400-1), TiO <sub>2</sub> @C-PDA (400-2) and TiO <sub>2</sub> @C-PDA (400-3) collected under air condition. .... | 5 |
| <b>Fig. S5</b> N <sub>2</sub> adsorption–desorption isotherms and the BJH corresponding pore size distribution curves of (a, b) TiO <sub>2</sub> @C-PDA (400-1, 2, 3). ....               | 6 |
| <b>Fig. S6</b> Zeta-potential of TiO <sub>2</sub> and TiO <sub>2</sub> @C-PDA (400-1,2,3) samples dispersed in aqueous solution with different pH values. ....                            | 6 |
| <b>Fig. S7</b> UV-Vis spectra of MO in the presence of TiO <sub>2</sub> @C-PDA (400-2) under visible light irradiation ( $\lambda > 420$ nm). ....                                        | 7 |
| <b>Fig. S8</b> Cycling use of TiO <sub>2</sub> @C-PDA (400-2) for photocatalytic degradation of MO. ....                                                                                  | 8 |
| <b>Fig. S9</b> X-ray diffraction patterns of TiO <sub>2</sub> @C-PDA (400-2) before and after photocatalytic experiment. ....                                                             | 8 |
| <b>2. Table</b> .....                                                                                                                                                                     | 9 |
| <b>Table S1</b> Quantitative atomic ratios of all elements obtained from XPS analysis. ....                                                                                               | 9 |

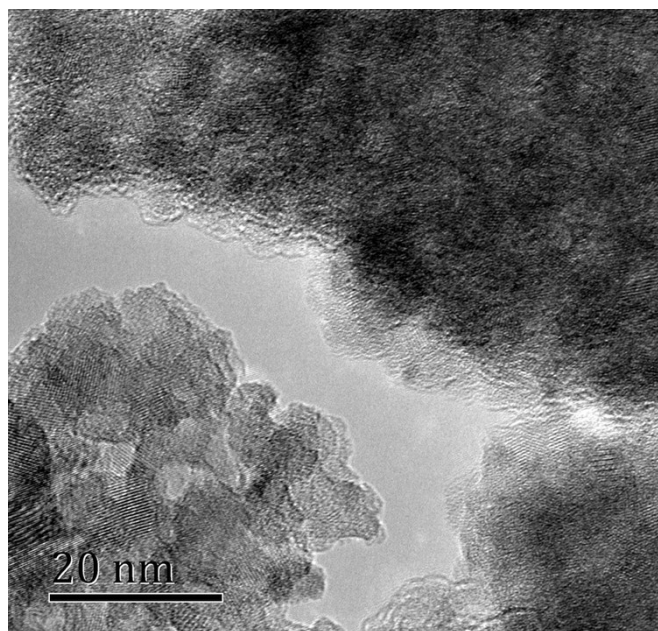

**Fig. S1** HRTEM image of TiO<sub>2</sub>@C-PDA (400-1).

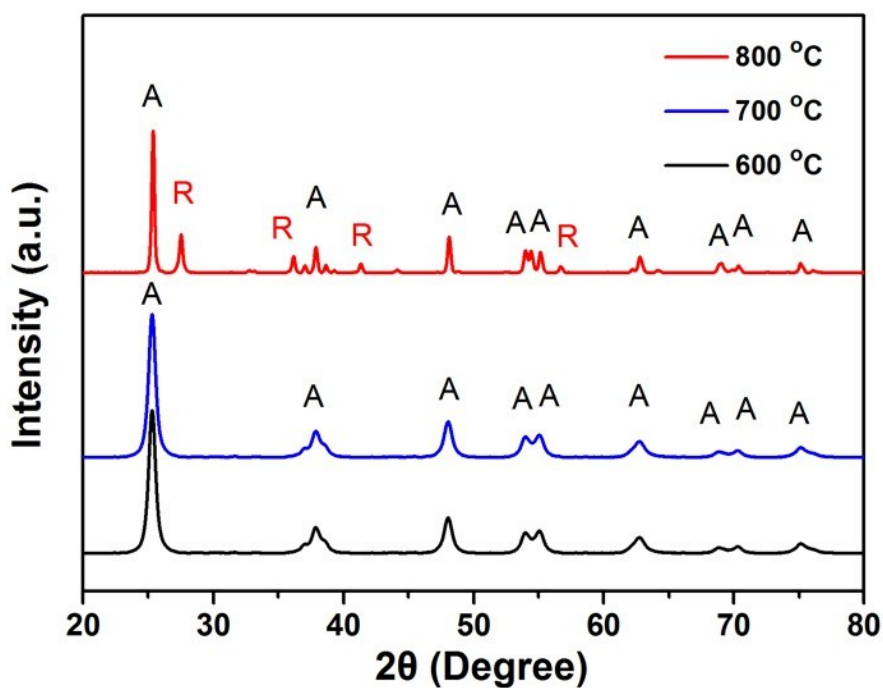

**Fig. S2** X-ray diffraction patterns of TiO<sub>2</sub>@PDA carbonized in argon for 3 hours at different temperatures, 600 (black line), 700 (blue line), 800 °C (red line). The temperature required for phase conversion of TiO<sub>2</sub>@PDA is up to 800 °C that indicates the high phase stability of TiO<sub>2</sub>@PDA hybrids.

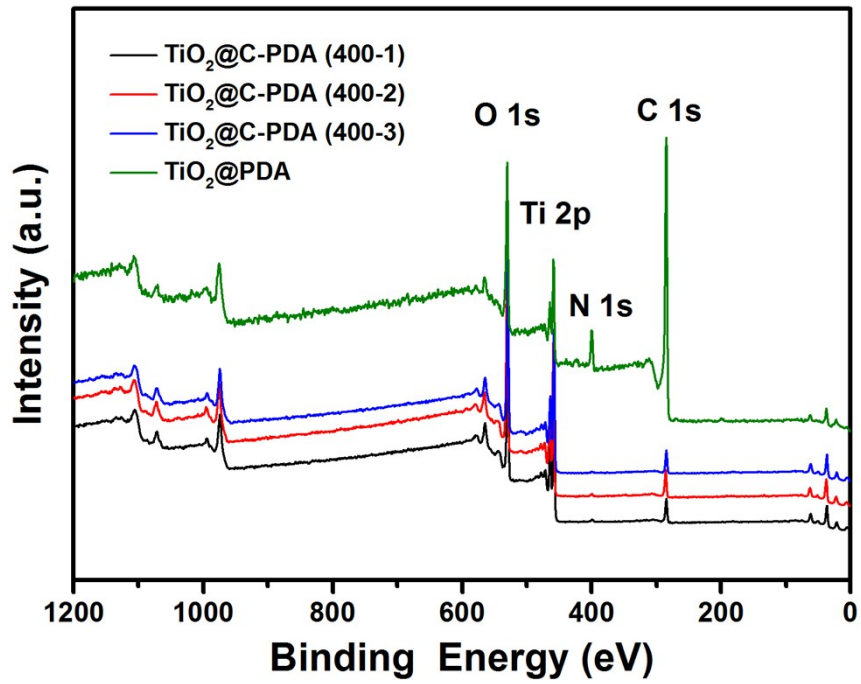

**Fig. S3** XPS spectra of TiO<sub>2</sub>@PDA and TiO<sub>2</sub>@C-PDA (400-1,2,3) samples.

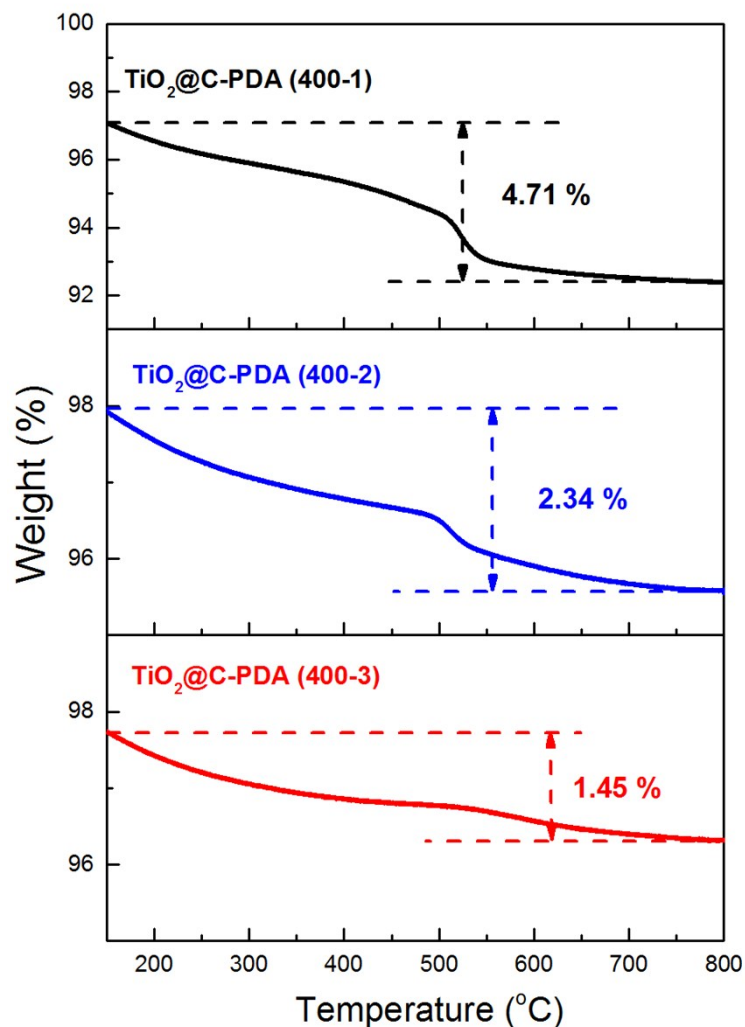

**Fig. S4** Thermogravimetric (TGA) curves of TiO<sub>2</sub>@C-PDA (400-1), TiO<sub>2</sub>@C-PDA (400-2) and TiO<sub>2</sub>@C-PDA (400-3) collected under air condition. Below 150 °C, mass loss was caused by dehydration from the samples. The calculation range is from 150 to 800 °C, which is related with the release of nitrogen and carbon. Weight ratio of carbon ( $W_{\text{carbon}}$ ) can be calculated through the following equation:  $\text{Weight loss} = W_{\text{carbon}} + W_{\text{nitrogen}}$ . The amount of doped nitrogen in the TiO<sub>2</sub>@C-PDA (400-1,2,3) samples was calculated from the XPS data. Therefore, we can conclude that the contents of carbon cover layer in the TiO<sub>2</sub>@C-PDA (400-1,2,3) samples are 3.80 wt%, 1.60 wt%, 1.09 wt%, respectively.

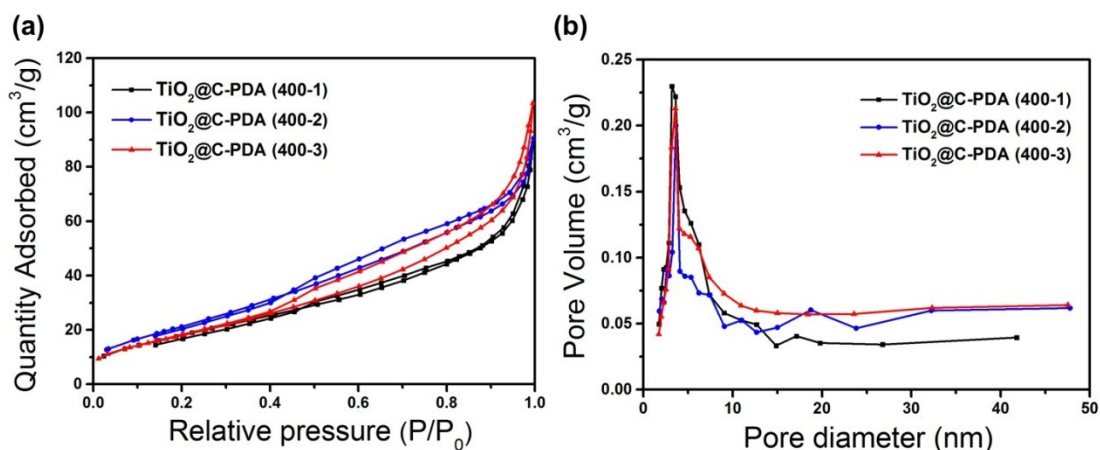

**Fig. S5** (a) N<sub>2</sub> adsorption–desorption isotherms and (b) the BJH corresponding pore size distribution curves of TiO<sub>2</sub>@C-PDA (400-1, 2, 3).

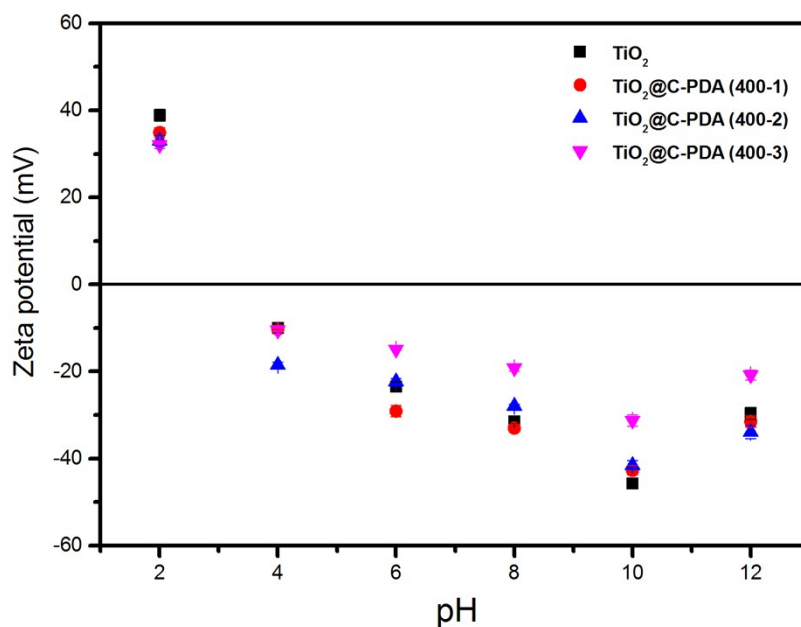

**Fig. S6** Zeta-potential of TiO<sub>2</sub> and TiO<sub>2</sub>@C-PDA samples dispersed in aqueous solution with different pH values.

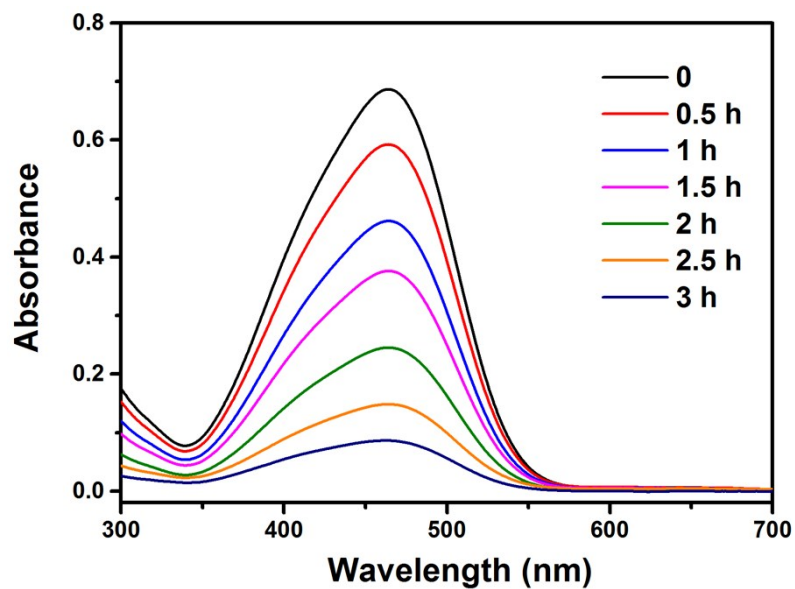

Fig S7. UV-Vis spectra of MO in the presence of TiO<sub>2</sub>@C-PDA (400-2) under visible light irradiation ( $\lambda > 420$  nm).

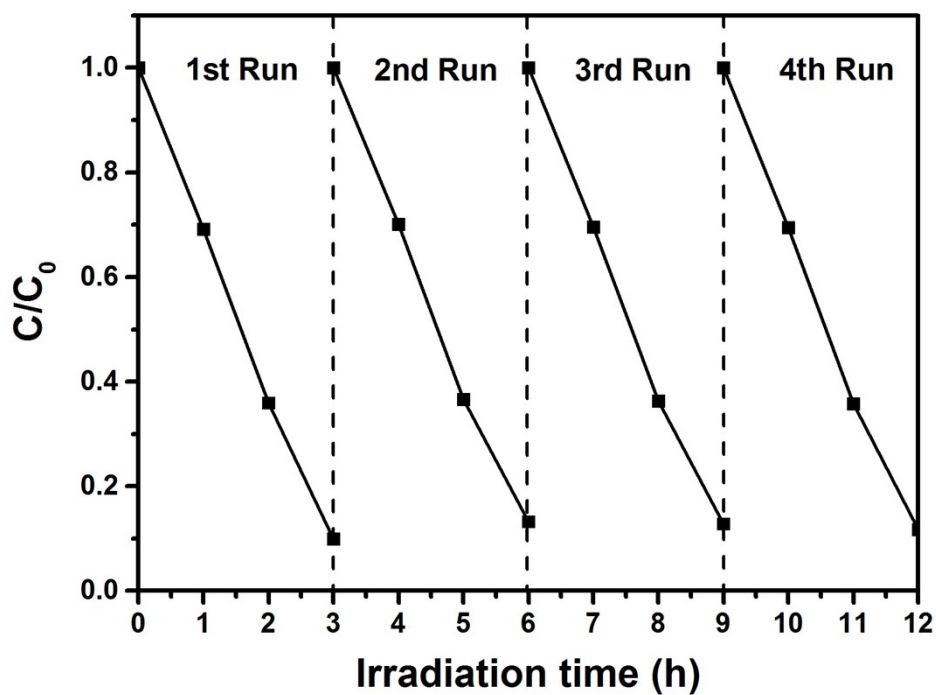

Fig S8. Cycling use of TiO<sub>2</sub>@C-PDA (400-2) for photocatalytic degradation of MO.

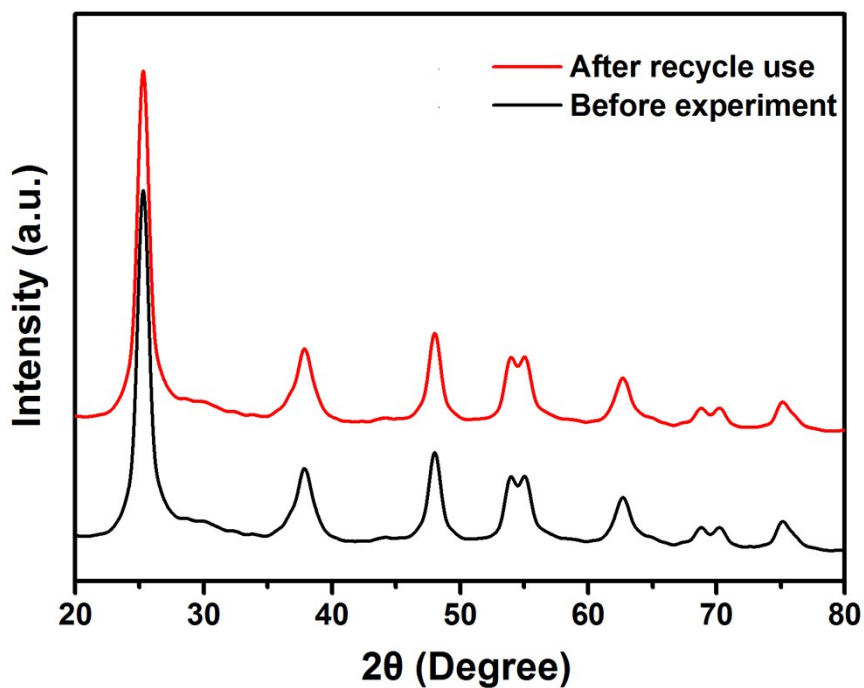

Fig S9. X-ray diffraction patterns of TiO<sub>2</sub>@C-PDA (400-2) before (black line) and after (red line) photocatalytic experiments.



**Table S1** Quantitative atomic ratios of all elements obtained from XPS analysis.

| Samples                         | C (at%) | N (at%) | Ti (at%) | O (at%) |
|---------------------------------|---------|---------|----------|---------|
| TiO <sub>2</sub> @ PDA          | 69.44   | 8.93    | 5.86     | 15.77   |
| TiO <sub>2</sub> @C-PDA (400-1) | 20.73   | 1.54    | 26.32    | 51.42   |
| TiO <sub>2</sub> @C-PDA (400-2) | 21.11   | 1.24    | 25.43    | 52.21   |
| TiO <sub>2</sub> @C-PDA (400-3) | 19.50   | 0.61    | 27.27    | 52.62   |
